# Supplementary material
Source: PubMed Central journal article supplement (PMC5748363)
Supplement: NIHMS920477-supplement-supplement_1.pdf [file NIHMS920477-supplement-supplement_1.pdf]

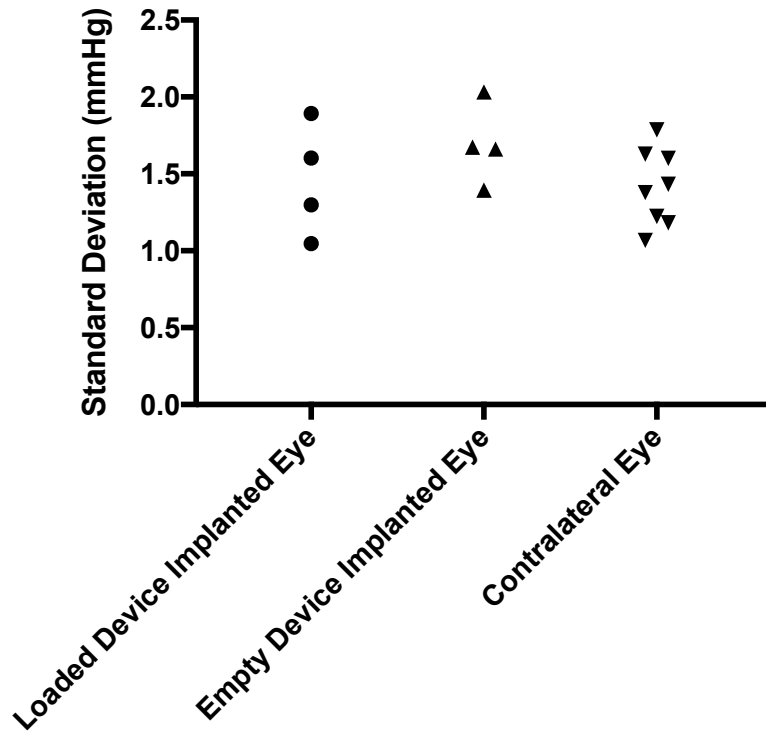

**Supplementary Figure 1.** Long-term IOP fluctuation, defined as the standard deviation of IOP measurements at all time points, among different treatment groups.
